# Supplementary material for: A system for in vitro selection of fully 2′-modified RNA aptamers
Source: Royal Society of Chemistry journal article supplement (doi:10.1039/d4ob01505c), 2025-01-01
Supplement: d4ob01505c1.pdf [file d4ob01505c1.pdf]

Please use files  
tab to view SI  
tables.
